# Supplementary material for: Impact of SSRI Therapy on Risk of Conversion From Mild Cognitive Impairment to Alzheimer’s Dementia in Individuals With Previous Depression
Source: Atypon-hosted journal article supplement (doi:10.1176/appi.ajp.2017.17040404), 2017-11-28

**TABLE S1. Antidepressant medication at baseline (all participants)**

| Antidepressant class             | No prior depression, but with antidepressant treatment at baseline*<br><i>n=34</i> |                              |    |                             |    |      | Prior depression and with antidepressant treatment at baseline<br><i>n=163</i> |                              |    |                             |    |      |
|----------------------------------|------------------------------------------------------------------------------------|------------------------------|----|-----------------------------|----|------|--------------------------------------------------------------------------------|------------------------------|----|-----------------------------|----|------|
|                                  | SSRIs                                                                              | N                            | %  | Other antidepressants       | N  | %    | SSRIs                                                                          | N                            | %  | Other antidepressants       | N  | %    |
| <b>Antidepressant agents</b>     | citalopram                                                                         | 02                           | 10 | SNRI duloxetine             | 00 | 00   | citalopram                                                                     | 23                           | 20 | SNRI duloxetine             | 08 | 17   |
|                                  | escitalopram                                                                       | 02                           | 10 | SNRI venlafaxine            | 03 | 21   | escitalopram                                                                   | 29                           | 25 | SNRI venlafaxine            | 15 | 32   |
|                                  | sertraline                                                                         | 09                           | 45 | NDRI bupropion              | 01 | 07   | sertraline                                                                     | 39                           | 34 | NDRI bupropion              | 11 | 23   |
|                                  | paroxetine                                                                         | 05                           | 25 | NaSSa mirtazapine           | 01 | 07   | paroxetine                                                                     | 12                           | 10 | NaSSa mirtazapine           | 08 | 17   |
|                                  | fluoxetine                                                                         | 02                           | 10 | Trazodone                   | 09 | 64   | fluoxetine                                                                     | 13                           | 11 | Trazodone                   | 03 | 06   |
|                                  |                                                                                    |                              |    | TCA amitriptyline           | 00 | 00   |                                                                                |                              |    | TCA amitriptyline           | 00 | 00   |
|                                  |                                                                                    |                              |    | TCA nortriptyline           | 00 | 00   |                                                                                |                              |    | TCA nortriptyline           | 01 | 02   |
|                                  |                                                                                    |                              |    | Tetracyclic antidepressants | 00 | 00   |                                                                                |                              |    | Tetracyclic antidepressants | 00 | 00   |
|                                  |                                                                                    |                              |    | MAO-inhibitor               | 00 | 00   |                                                                                |                              |    | MAO-inhibitor               | 01 | 02   |
|                                  |                                                                                    |                              |    | tranylcypromine             |    |      |                                                                                |                              |    | tranylcypromine             |    |      |
| <b>Treatment duration (days)</b> | <b>SSRIs</b>                                                                       | <b>Other antidepressants</b> |    |                             |    |      | <b>SSRIs</b>                                                                   | <b>Other antidepressants</b> |    |                             |    |      |
|                                  | Mean                                                                               | 1475                         |    |                             |    | 1484 |                                                                                | 2481                         |    |                             |    | 1703 |
|                                  | SD                                                                                 | 1182                         |    |                             |    | 1747 |                                                                                | 2718                         |    |                             |    | 1628 |
|                                  | Minimum                                                                            | 238                          |    |                             |    | 166  |                                                                                | 04                           |    |                             |    | 269  |
|                                  | Maximum                                                                            | 4583                         |    |                             |    | 6126 |                                                                                | 16051                        |    |                             |    | 9422 |

\* Antidepressant medication due to an indication other than depression.

SSRI: selective serotonin reuptake inhibitors, SNRI: serotonin-norepinephrine reuptake inhibitor, NDRI: norepinephrine-dopamine reuptake inhibitor, NaSSa: Noradrenergic and specific serotonergic antidepressant, TCA: tricyclic antidepressant, MAO-inhibitor: monoamine oxidase inhibitor.

FIGURE S1.

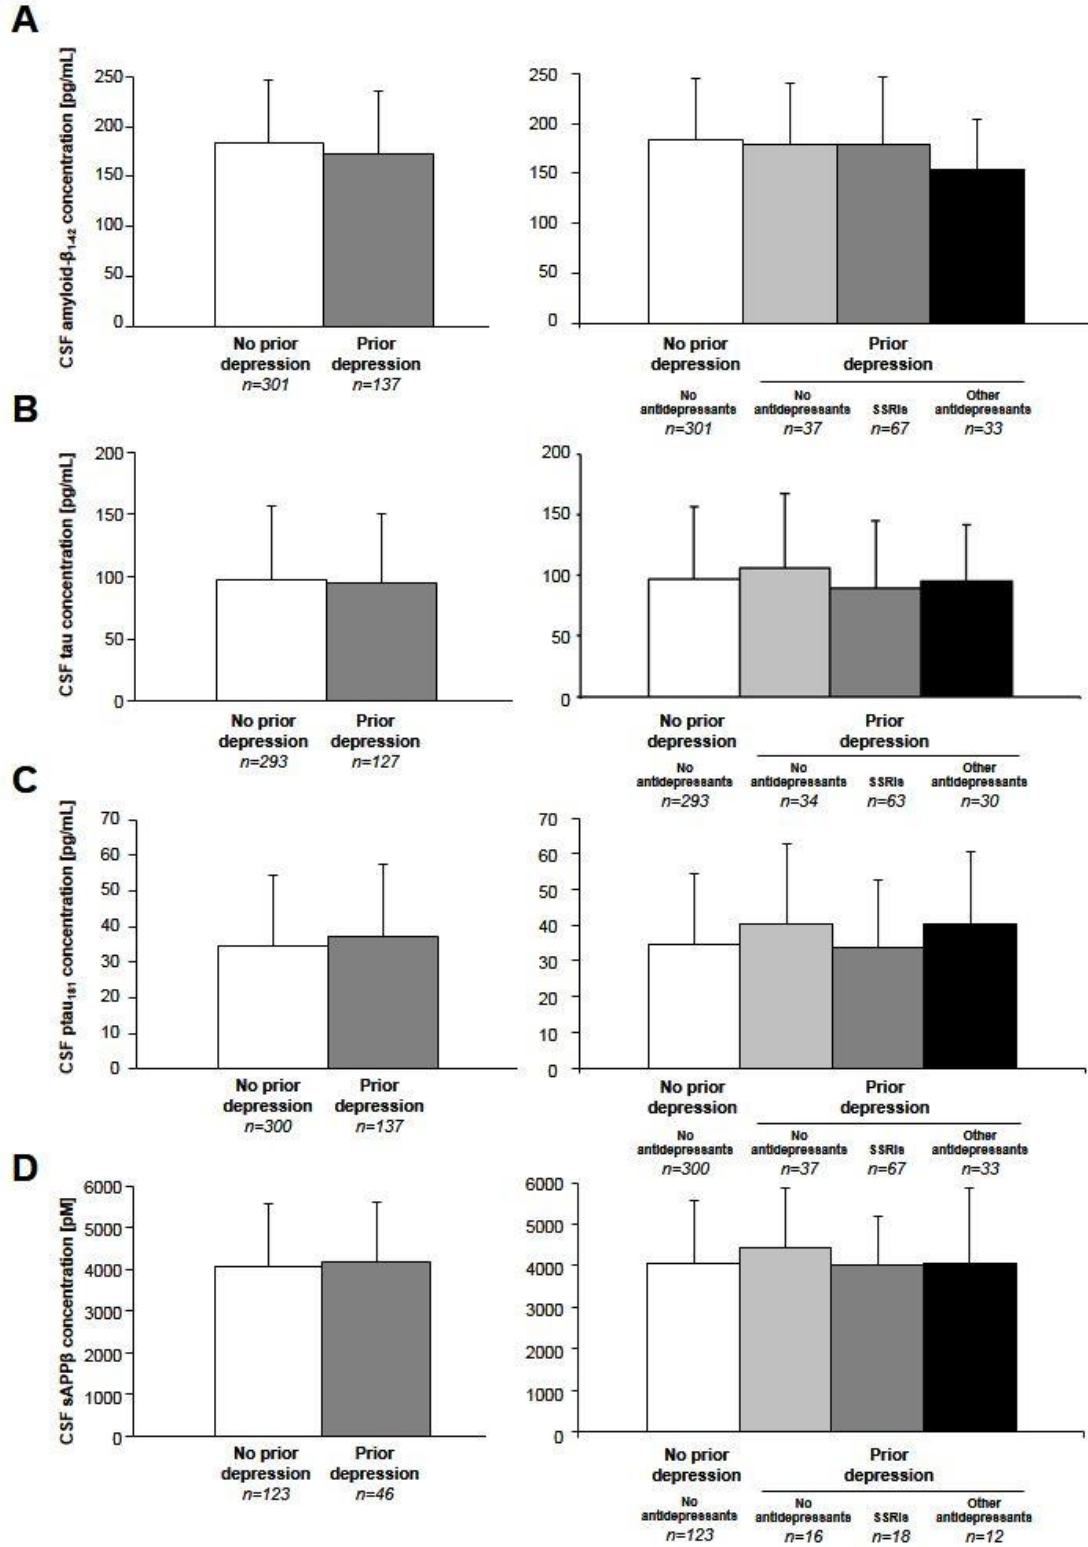

FIGURE S2.

**A**

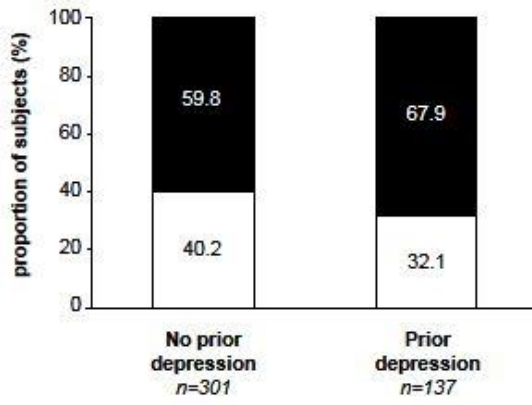

**B**

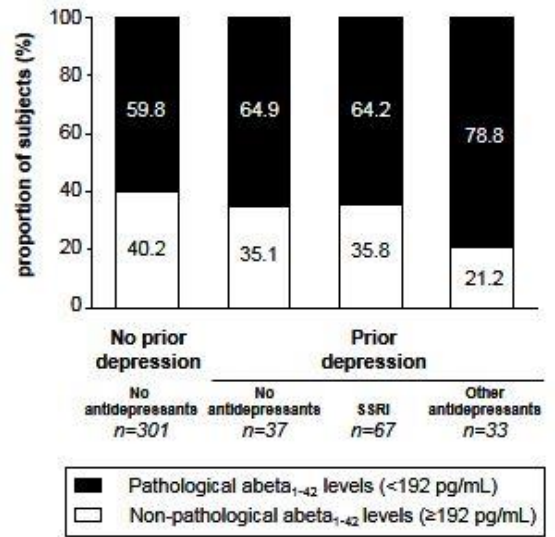

FIGURE S3.

**A** Mean CSF amyloid- $\beta$  concentrations of MCI patients with pathological amyloid- $\beta$  levels ( $<192\text{pg/ml}$ )

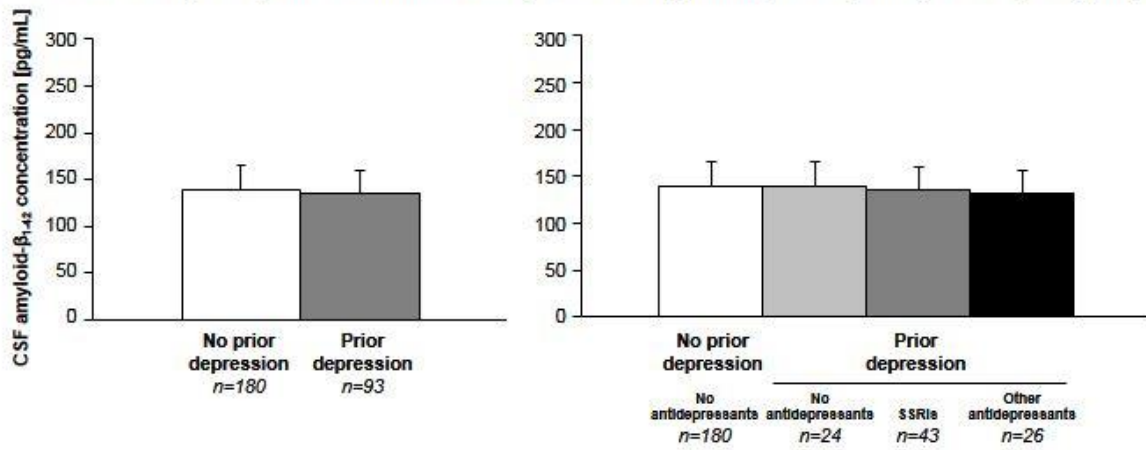

**B** Mean CSF amyloid- $\beta$  concentrations of MCI patients with non-pathological amyloid- $\beta$  levels ( $\geq 192\text{pg/ml}$ )

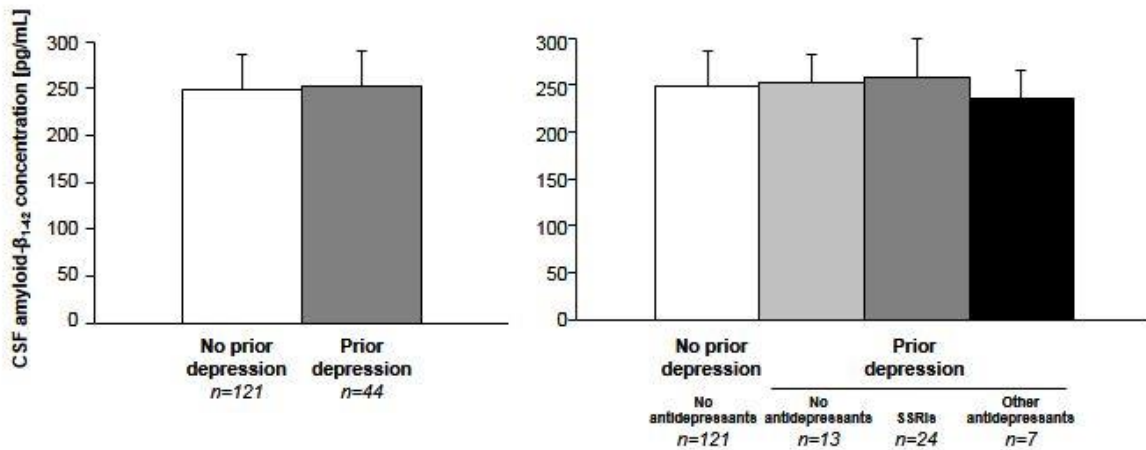

Supplement: appi.ajp.2017.17040404.ds001.pdf [file appi.ajp.2017.17040404.ds001.pdf]
